# Supplementary material for: Human milk fungi: environmental determinants and inter-kingdom associations with milk bacteria in the CHILD Cohort Study
Source: PubMed Central journal article supplement (PMC7275434; doi:10.1186/s12866-020-01829-0), 2020-06-05
Supplement: 12866_2020_1829_MOESM1_ESM.pdf [file 12866_2020_1829_MOESM1_ESM.pdf]

## **Human milk fungi: environmental determinants and inter-kingdom associations with milk bacteria in CHILD Cohort Study (Moossavi et. al.)**

### **Supplementary Tables and Figures:**

Table S1. Characteristics of mother-infant dyads from the CHILD Cohort included in this analysis (N=271) in comparison with previous bacterial analysis (N=393).

Table S2. Milk characteristics of mother-infant dyads for fungal sequencing.

Table S3. Comparison of characteristics of mother-infant dyads from the CHILD Cohort included in this study across study cities

Table S4. Most abundant fungal genera (>1% mean relative abundance) in the human milk microbiota among 58 mothers with detectable milk fungi in the CHILD Cohort.

Figure S1. Milk bacterial composition outlier.

Figure S2. Association of milk bacterial clusters and bacterial composition outliers with fungal richness and diversity tested by ANOVA.

Supplementary references

**Table S1. Characteristics of mother-infant dyads from the CHILD Cohort included in this analysis (N=271) in comparison with previous bacterial analysis (N=393).**

|                                  | Characteristics                                                     | Mean ± SD or n (%) <sup>a</sup> |                         |
|----------------------------------|---------------------------------------------------------------------|---------------------------------|-------------------------|
|                                  |                                                                     | Fungal study (N=271)            | Bacterial study (N=393) |
| <b>Maternal</b>                  | FUT2 secretor                                                       | 195 (72.8)                      | 279 (71.7)              |
|                                  | Ethnicity                                                           |                                 |                         |
|                                  | Caucasian                                                           | 197 (72.7)                      | 287 (73.0)              |
|                                  | Asian                                                               | 52 (19.2)                       | 73 (18.6)               |
|                                  | First Nations                                                       | 10 (3.7)                        | 15 (3.8)                |
|                                  | Other                                                               | 12 (4.2)                        | 18 (4.6)                |
|                                  | Prenatal smoking                                                    | 13 (4.8)                        | 18 (4.6)                |
| History of atopy                 | 181 (67)                                                            | 251 (63.9)                      |                         |
| <b>Infant</b>                    | Birth weight (g)                                                    | 3476 ± 476                      | 3469 ± 469              |
|                                  | Female sex                                                          | 125 (46.1)                      | 192 (48.3)              |
|                                  | Gestational age (weeks)                                             | 39.2 ± 1.3                      | 39.2 ± 1.3              |
|                                  | History of oral thrush                                              | 33 (12.2)                       | 46 (11.8)               |
|                                  | Child antibiotics before 3-4 months                                 | 9 (3.3)                         | 11 (2.9)                |
|                                  | Asthma at 3 years <sup>b</sup>                                      | 48 (17.7)                       | 47 (12.5)               |
| <b>Early life</b>                | Mode of delivery                                                    |                                 |                         |
|                                  | Elective C/S                                                        | 34 (12.6)                       | 46 (11.9)               |
|                                  | Emergency C/S                                                       | 32 (11.9)                       | 47 (12.1)               |
|                                  | Vaginal                                                             | 203 (75.5)                      | 294 (76.0)              |
|                                  | Older siblings                                                      |                                 |                         |
|                                  | None                                                                | 148 (54.6)                      | 211 (53.7)              |
|                                  | One                                                                 | 89 (32.8)                       | 126 (32.1)              |
| Two or more                      | 34 (12.5)                                                           | 56 (14.2)                       |                         |
| Maternal intrapartum antibiotics | 96 (35.6)                                                           | 131 (35.4)                      |                         |
| <b>BF</b>                        | Direct BF (at the breast) only                                      | 108 (40.0)                      | 162 (41.9)              |
|                                  | Pump expression <sup>c</sup>                                        | 77 (81.9)                       | 91 (81.2)               |
| <b>Home environment</b>          | Sample collection season                                            |                                 |                         |
|                                  | Spring (March-May)                                                  | 58 (21.5)                       | 72 (18.6)               |
|                                  | Summer (June-August)                                                | 64 (27.4)                       | 103 (26.5)              |
|                                  | Autumn (September-November)                                         | 74 (23.7)                       | 112 (28.9)              |
|                                  | Winter (December-February)                                          | 74 (27.4)                       | 101 (26.0)              |
|                                  | High mould <sup>d</sup>                                             | 90 (33.3)                       | 137 (34.9)              |
|                                  | High moisture <sup>d</sup>                                          | 120 (44.4)                      | 183 (46.6)              |
|                                  | High dust <sup>d</sup>                                              | 144 (53.3)                      | 208 (52.9)              |
|                                  | Dog ownership                                                       | 82 (30.2)                       | 119 (30.2)              |
|                                  | Furry pets                                                          | 137 (50.6)                      | 201 (51.0)              |
|                                  | Urban residence                                                     | 242 (95.7)                      | 91 (92.8)               |
|                                  | High population density                                             | 126 (49.8)                      | 195 (52.7)              |
|                                  | Residential vegetation during the 1 <sup>st</sup> year <sup>e</sup> |                                 |                         |
|                                  | Grey                                                                | 16 (6.0)                        | 20 (5%)                 |
|                                  | Moderately green                                                    | 92 (34.3)                       | 135 (35%)               |
|                                  | Green                                                               | 160 (59.7)                      | 233 (60%)               |
|                                  | Study sites                                                         |                                 |                         |
| Vancouver                        | 67 (24.7)                                                           | 96 (24.3)                       |                         |
| Edmonton                         | 61 (22.5)                                                           | 99 (25.1)                       |                         |
| Manitoba                         | 81 (29.9)                                                           | 96 (24.3)                       |                         |
| Toronto                          | 62 (22.9)                                                           | 104 (26.3)                      |                         |

<sup>a</sup> Percentages are calculated after excluding dyads with missing data. BF, breastfeeding; BMI, body mass index; C/S, Caesarean section; HMO, human milk oligosaccharide. <sup>b</sup> Asthma was diagnosed by an expert study physician at the at age 3 years and classified for this analysis as “possible or probable asthma” or “no asthma”. <sup>c</sup> data available for a subset of dyads (n=94); <sup>d</sup> Each exposure was categorized into high or low (above or below median); <sup>e</sup> Defined based on normalized difference vegetation index (NDVI) in a 250 m buffer around the mother’s residential addresses during the

**Table S2. Milk characteristics of mother-infant dyads for fungal sequencing.**

| <b>Characteristics</b>                      | <b>Current Fungal study (N=271)</b> | <b>Previous Bacterial study (N=393)</b> |
|---------------------------------------------|-------------------------------------|-----------------------------------------|
| Bacterial richness (observed ASVs)          |                                     |                                         |
| Overall                                     | 145.3 ± 46.3                        | 146.8 ± 43.8                            |
| Proteobacteria                              | 104 ± 29.9                          | 105.9 ± 28.4                            |
| Firmicutes                                  | 16.4 ± 15.1                         | 15.9 ± 13.6                             |
| Actinobacteria                              | 14.0 ± 5.6                          | 14.1 ± 5.4                              |
| Bacterial diversity (Inverse Simpson Index) |                                     |                                         |
| Overall                                     | 15.2 ± 9.2                          | 15.8 ± 8.9                              |
| Proteobacteria                              | 16.3 ± 7.5                          | 16.8 ± 6.9                              |
| Firmicutes                                  | 3.2 ± 1.5                           | 3.2 ± 1.4                               |
| Actinobacteria                              | 3.8 ± 1.8                           | 3.7 ± 1.7                               |
| Bacterial taxonomic clusters <sup>a</sup>   |                                     |                                         |
| C1                                          | 33 (12.2)                           | 42 (10.7)                               |
| C2                                          | 73 (27.0)                           | 98 (24.9)                               |
| C3                                          | 93 (34.5)                           | 161 (41.0)                              |
| C4                                          | 71 (26.3)                           | 92 (23.4)                               |
| Bacterial composition outliers <sup>b</sup> | 35 (12.9)                           | 45 (11.5)                               |
| HMO diversity                               | 4.9 ± 1.4                           | 4.9 ± 1.4                               |
| HMO concentration (mg/mL)                   | 10.2 ± 2.1                          | 10.2 ± 2.1                              |

<sup>a</sup> Defined based on hierarchical clustering of the core ASVs as previously described [1]. <sup>b</sup> Defined as those contributing greater than the median plus twice the interquartile range of the sample variance to the total [2]. All dyads included in the current fungal study were also included in the previous bacterial study [1].

**Table S3. Comparison of characteristics of mother-infant dyads from the CHILD Cohort included in this study across study cities**

| Characteristics                                                     | Mean ± SD or n (%) <sup>a</sup> |           |           |           | P value        |
|---------------------------------------------------------------------|---------------------------------|-----------|-----------|-----------|----------------|
|                                                                     | Vancouver                       | Edmonton  | Manitoba  | Toronto   |                |
| <b>Maternal, infant, and early life</b>                             |                                 |           |           |           |                |
| Birth mode                                                          |                                 |           |           |           |                |
| Vaginal                                                             | 53 (79.1)                       | 44 (72.1) | 63 (79.8) | 43 (69.4) | 0.723          |
| Elective C/S                                                        | 6 (9.0)                         | 9 (14.8)  | 8 (10.1)  | 11 (17.7) |                |
| Emergency C/S                                                       | 8 (11.9)                        | 8 (13.1)  | 8 (10.1)  | 8 (12.9)  |                |
| Maternal atopy                                                      | 44 (65.7)                       | 34 (55.7) | 60 (74.1) | 43 (69.4) | 0.137          |
| Female sex                                                          | 31 (46.3)                       | 30 (49.2) | 36 (44.5) | 28 (45.2) | 0.951          |
| Multiparous                                                         | 21 (31.3)                       | 28 (45.9) | 46 (56.7) | 28 (45.2) | <b>0.022</b>   |
| <b>Breastfeeding and HMOs</b>                                       |                                 |           |           |           |                |
| Direct BF (at the breast) only                                      | 27 (40.3)                       | 27 (44.3) | 29 (36.3) | 25 (40.3) | 0.816          |
| Exclusive BF at sample collection                                   | 41 (61.2)                       | 21 (34.4) | 42 (51.9) | 26 (41.9) | <b>0.014</b>   |
| Total HMO concentration (mg/mL)                                     | 10.3±2.3                        | 10.5±2.1  | 10.0±2.2  | 10.1±1.8  | 0.505          |
| DSLNT (%)                                                           | 1.46±1.61                       | 2.23±1.47 | 1.82±1.85 | 1.98±1.83 | 0.074          |
| LNH (%)                                                             | 0.53±0.41                       | 0.54±0.43 | 0.67±0.55 | 0.49±0.39 | 0.11           |
| <b>Home environment</b>                                             |                                 |           |           |           |                |
| Sample collection season                                            |                                 |           |           |           |                |
| Spring                                                              | 9 (13.6)                        | 17 (27.9) | 21 (25.9) | 11 (17.7) | 0.056          |
| Summer                                                              | 14 (21.2)                       | 13 (21.3) | 14 (17.3) | 23 (37.1) |                |
| Autumn                                                              | 20 (30.3)                       | 13 (20.9) | 28 (34.6) | 13 (21.0) |                |
| Winter                                                              | 23 (34.8)                       | 18 (29.5) | 18 (22.2) | 15 (24.2) |                |
| High mould                                                          | 29 (43.3)                       | 15 (25.0) | 12 (14.8) | 34 (55.7) | < <b>0.001</b> |
| High moisture                                                       | 29 (43.3)                       | 29 (47.5) | 41 (50.6) | 21 (34.4) | 0.261          |
| High dust                                                           | 41 (61.2)                       | 42 (68.8) | 32 (39.5) | 29 (47.5) | <b>0.002</b>   |
| Furry pets ownership                                                | 28 (41.8)                       | 38 (62.3) | 43 (53.1) | 28 (45.2) | 0.095          |
| Urban residence                                                     | 54 (98.1)                       | 58 (98.3) | 71 (89.9) | 59 (98.3) | <b>0.026</b>   |
| High population density                                             | 41 (74.5)                       | 15 (25.4) | 23 (29.1) | 47 (78.3) | < <b>0.001</b> |
| Residential vegetation during the 1 <sup>st</sup> year <sup>b</sup> |                                 |           |           |           |                |
| Grey                                                                | 2 (3.0)                         | 4 (6.7)   | 6 (7.4)   | 4 (6.6)   | < <b>0.001</b> |
| Moderately green                                                    | 11 (16.7)                       | 33 (55.0) | 41 (50.6) | 7 (11.5)  |                |
| Green                                                               | 53 (80.3)                       | 23 (38.3) | 34 (42.0) | 50 (81.9) |                |
| <b>Climate<sup>c</sup></b>                                          |                                 |           |           |           |                |
| Daily average temperature (°C)                                      | 10.4                            | 4.2       | 3.0       | 8.2       | -              |
| Daily maximum temperature (°C)                                      | 13.9                            | 9.3       | 8.7       | 13.0      | -              |
| Daily minimum temperature (°C)                                      | 6.8                             | -1.0      | -2.7      | 3.3       | -              |
| Annual precipitation (mm)                                           | 1189                            | 456       | 521       | 786       | -              |
| Days with ≥5mm precipitation                                        | 77                              | 25        | 29        | 49        | -              |
| Average Relative Humidity - 0600LST (%)                             | 85.9                            | 76.3      | 82.4      | 81.3      | -              |
| Average Relative Humidity - 1500LST (%)                             | 70.3                            | 54.1      | 61.1      | 61.3      | -              |
| Landscape                                                           | Coastal                         | Prairie   | Prairie   | Shield    | -              |

<sup>a</sup> Percentages are calculated after excluding dyads with missing data. Other factors tested but not shown: maternal ethnicity, intrapartum antibiotics, dog ownership, maternal secretor status, and maternal prenatal smoking. BF, breastfeeding; BMI, body mass index; C/S, caesarean section; HMO, human milk oligosaccharide.

<sup>b</sup> Defined based on normalized difference vegetation index (NDVI) in a 250 m buffer around the mother's residential addresses during the 12 months postpartum

<sup>c</sup> From results of 1981-2019 [http://climate.weather.gc.ca/climate\\_normals](http://climate.weather.gc.ca/climate_normals) (accessed 13 March 2019)

**Table S4. Most abundant fungal genera (>1% mean relative abundance) in the human milk microbiota among 58 mothers with detectable milk fungi in the CHILd Cohort.**

| Phylum        | Genera                              | Prevalence (%) <sup>a</sup> | Relative abundance (%) |     |         |
|---------------|-------------------------------------|-----------------------------|------------------------|-----|---------|
|               |                                     |                             | Mean±SD                | CV  | Maximum |
| Ascomycota    | <i>Candida</i>                      | 60.3                        | 28.6±38.2              | 1.3 | 100     |
| Ascomycota    | <i>Clavispora</i>                   | 3.4                         | 2.7±14.5               | 5.3 | 79.1    |
| Ascomycota    | <i>Exophiala</i>                    | 17.2                        | 3.2±15.3               | 4.8 | 90.7    |
| Ascomycota    | <i>Penicillium</i>                  | 3.4                         | 2.8±15.3               | 5.5 | 98.8    |
| Ascomycota    | <i>Alternaria</i>                   | 50.0                        | 6.9±20.8               | 3.0 | 94.5    |
| Ascomycota    | Unclassified <i>Capnodiales</i>     | 20.7                        | 2.8±10.4               | 3.8 | 56.7    |
| Ascomycota    | <i>Aureobasidium</i>                | 12.1                        | 2.7±13.6               | 4.9 | 82.1    |
| Ascomycota    | Unclassified <i>Dipodascus</i>      | 1.7                         | 1.5±11.2               | 7.6 | 85.3    |
| Ascomycota    | Unclassified <i>Trichomeriaceae</i> | 5.2                         | 1.1±8.0                | 7.6 | 61.1    |
| Basidiomycota | <i>Filobasidium</i>                 | 3.4                         | 1.7±12.4               | 7.5 | 94.6    |
| Basidiomycota | <i>Rhodotorula</i>                  | 43.1                        | 10.3±24.7              | 2.4 | 96.9    |
| Basidiomycota | <i>Malassezia</i>                   | 6.9                         | 1.0±7.3                | 7.1 | 55.5    |

<sup>a</sup> Percentage of samples where the taxa was present. This analysis is restricted to the 58 samples (of 271 analysed) where fungi were detected.

CV, coefficient of variation.

**Figure S1. Milk bacterial composition outlier.** A) Identification based on Principal Component (PC)1 variance. B) Beta diversity of milk bacterial composition based on Bray-Curtis dissimilarity measure.

**A)**

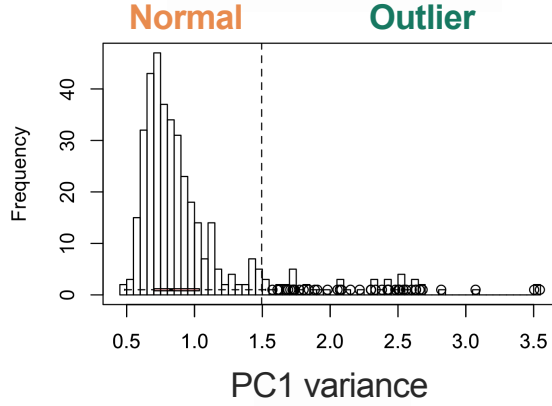

**B)**

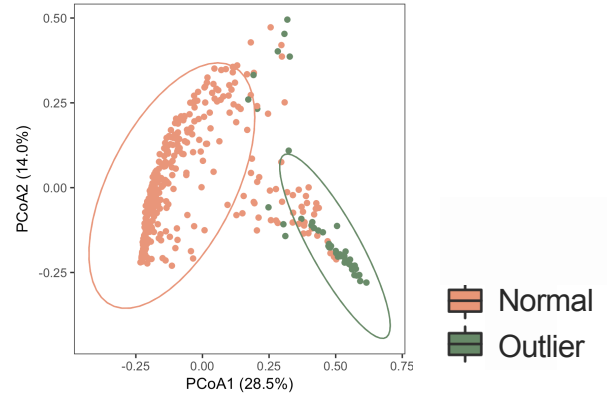

**Figure S2. Association of milk bacterial clusters and bacterial composition outliers with fungal richness and diversity tested by Kruskal-Wallis and Wilcoxon rank sum tests, respectively.**

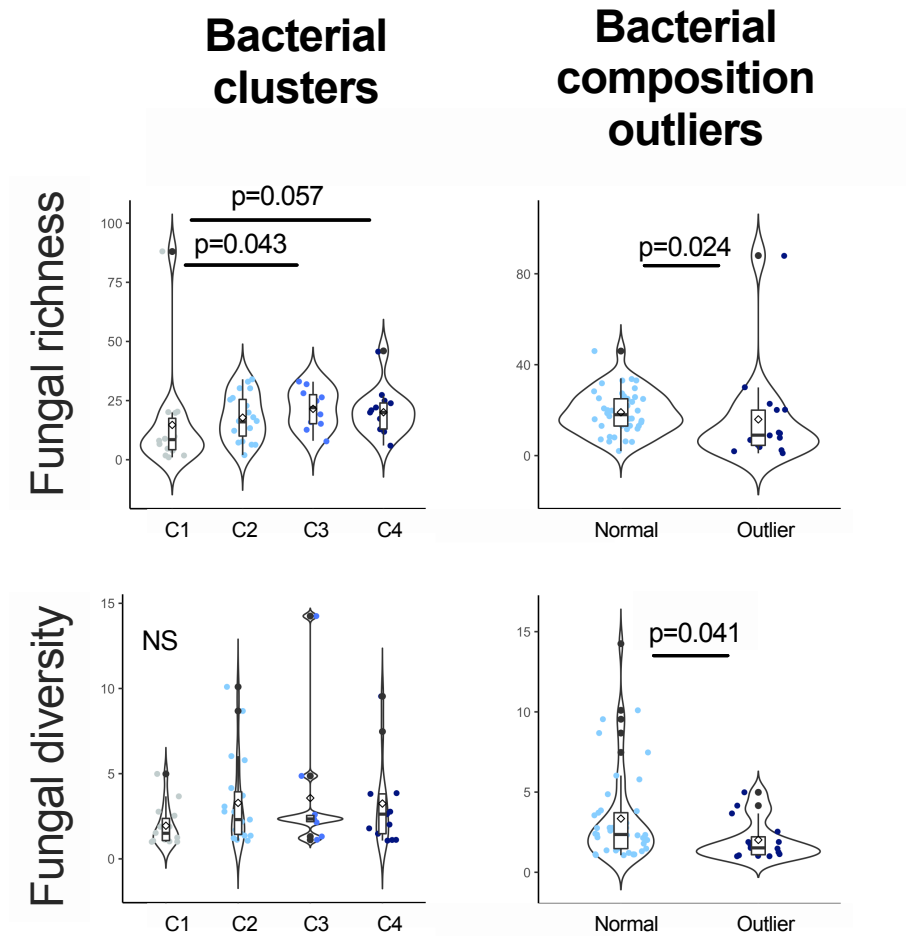

## Supplementary references

1. Moossavi S, Sepehri S, Robertson B, Bode L, Goruk S, Field CJ, Lix LM, de Souza RJ, Becker AB, Mandhane PJ *et al*: Composition and Variation of the Human Milk Microbiome is Influenced by Maternal and Early Life Factors *Cell Host Microbe* 2019, 25:324-335.
2. Gloor GB, Wu JR, Pawlowsky-Glahn V, Egozcue JJ: It's all relative: analyzing microbiome data as compositions. *Ann Epidemiol* 2016, 26(5):322-329.
